# Supplementary material for: Air–sea fluxes of greenhouse gases and oxygen in the northern Benguela Current region during upwelling events
Source: Copernicus journal article supplement (doi:10.5194/bg-16-4065-2019), 2019-10-21
Supplement: Supplementary file 1 [file bg-16-4065-2019-supplement.zip]

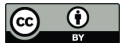

*Supplement of*

**Air–sea fluxes of greenhouse gases and oxygen in the northern Benguela  
Current region during upwelling events**

**Eric J. Morgan et al.**

*Correspondence to:* Eric J. Morgan ([ejmorgan@ucsd.edu](mailto:ejmorgan@ucsd.edu))

- [bg-16-4065-2019-supplement-title-page.pdf](#)
- [ndao.csv](#)

The copyright of individual parts of the supplement might differ from the CC BY 4.0 License.
